# Supplementary material for: Mast Cells Modulate Antigen-Specific CD8+ T Cell Activation During LCMV Infection
Source: PubMed Central journal article supplement (PMC8236703; doi:10.3389/fimmu.2021.688347), 2021-06-14
Supplement: DataSheet_1.pdf [file DataSheet_1.pdf]

Supplementary Material

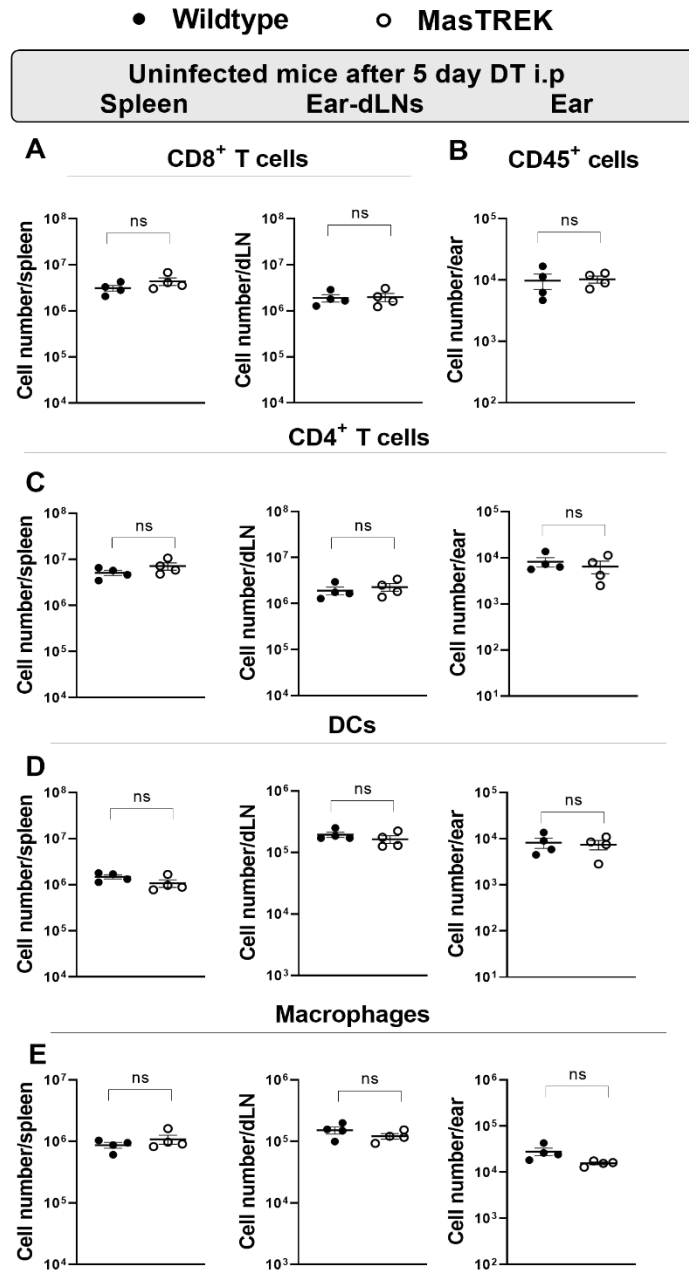

**Supplementary Figure 1. Uninfected WT and MasTREK mice exhibit similar frequencies of immune cells after MC depletion.** (A) Absolute cell numbers of CD8<sup>+</sup> T cells in the spleen and dLN, (B) CD45<sup>+</sup> cells in the ears as well as (C) CD4<sup>+</sup> T cells, (D) DCs (CD11c<sup>+</sup> MCHII<sup>+</sup>) and (E) macrophages (F4/80<sup>+</sup> CD11b<sup>+</sup>) in the spleen, ear-dLN and ears of WT and MasTREK mice treated on 5 consecutive days with DT (250 ng/mouse i.p.) before LCMV infection and analyzed by flow cytometry. All experiments were performed at least twice, and each experimental group included n ≥ 4. Data are representative and expressed as mean ± SEM. Statistically significant differences are analyzed by t-test and indicated as follows: ns = not significant.

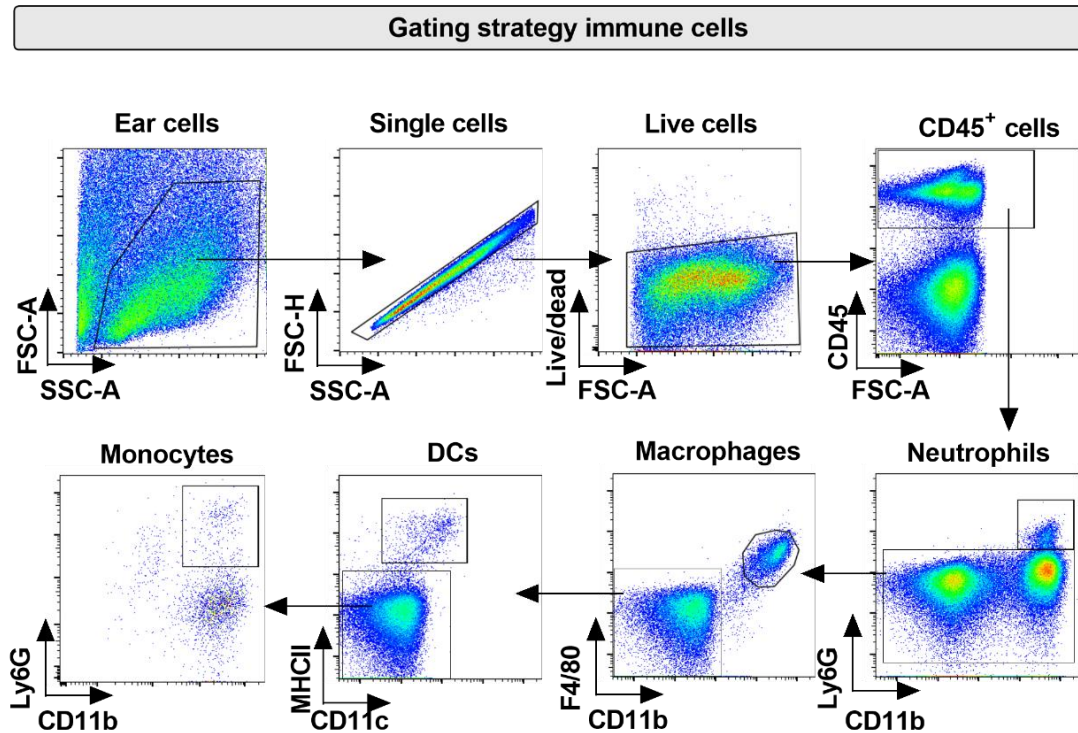

**Supplementary Figure 2. Gating strategy for immune cell analysis.**

Representative dot plots of the ear showing the gating strategy used for the identification of immune cell subsets in the spleen, ear-dLNs and ears of WT and MasTRECK mice. After gating the total immune cells followed by single cell gate, cells were gated on Zombie-Aqua<sup>+</sup> to discriminate between live and dead. Live cells were gated on haematopoietic cells (CD45<sup>+</sup>) that were subsequently gated on neutrophils (Ly6G<sup>+</sup>CD11b<sup>+</sup>), macrophages (F4/80<sup>+</sup>CD11b<sup>+</sup>), DCs MHCII<sup>+</sup>CD11c<sup>+</sup>) and monocytes (Ly6C<sup>+</sup>CD11b<sup>+</sup>).

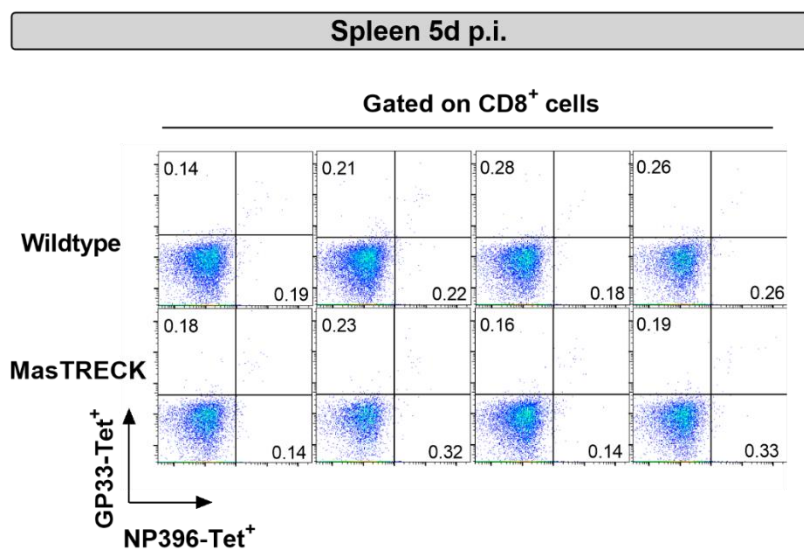

**Supplementary Figure 3. Virus-specific CD8<sup>+</sup> T cells are not present in the spleen at day 5 post infection**

FACS plots of GP33-Tetramer<sup>+</sup> and NP396-Tetramer<sup>+</sup> CD8<sup>+</sup> T cells in the spleen of infected WT and MasTRECK mice at day 5 post intradermal LCMV infection.

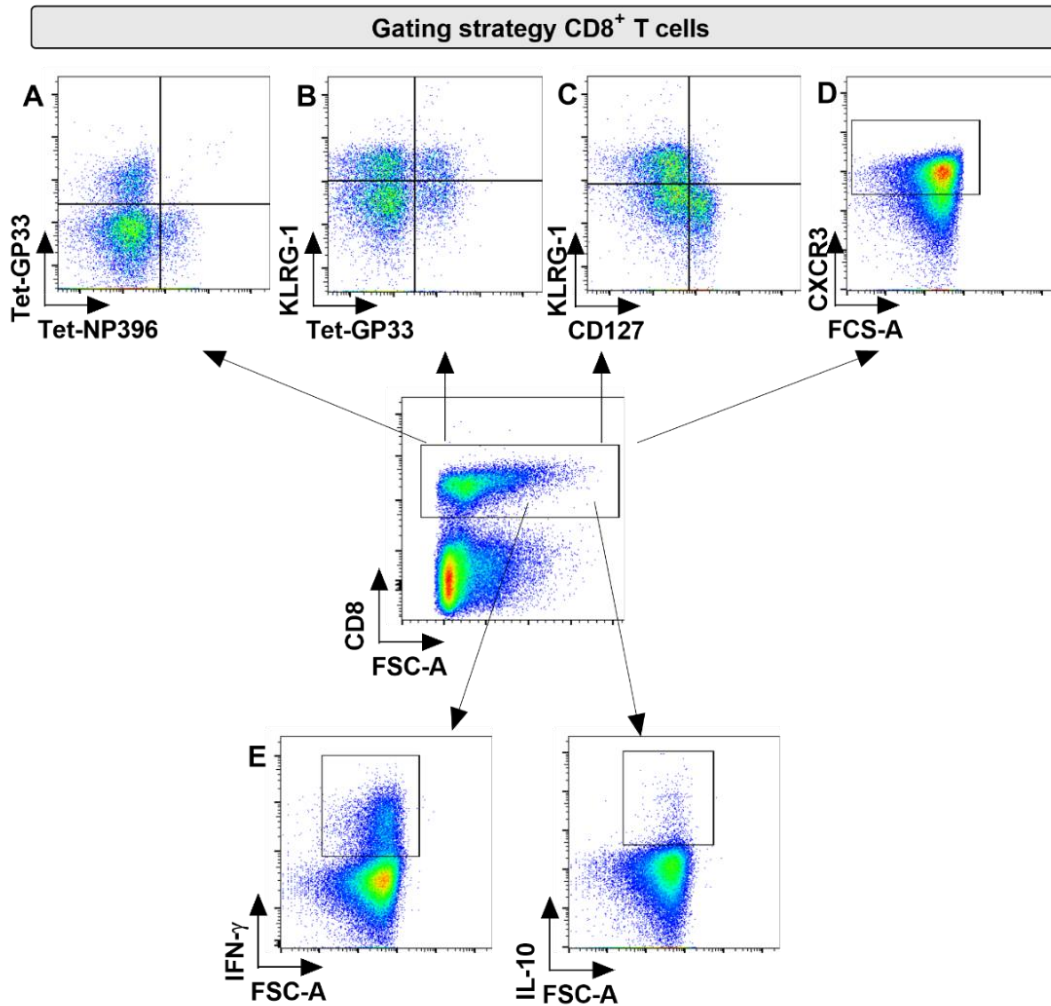

**Supplementary Figure 4. Gating strategy for CD8<sup>+</sup> T cells<sup>+</sup> analysis.**

Representative dot plots of the spleen showing the gating strategy used to identify and characterize CD8<sup>+</sup> T cells in the spleen, ear-dLNs and ears of WT and MastRECK mice. After gating on CD8<sup>+</sup> T cells, LCMV-specific CD8<sup>+</sup> T cells were subsequently gated on (A) Tet-GP33<sup>+</sup> and Tet-NP396<sup>+</sup> and on (B) KLRG-1<sup>+</sup> Tet-GP33<sup>+</sup>, short lived-effector CD8<sup>+</sup> T cells were gated on (C) KLRG-1<sup>+</sup> IL-7R<sup>-</sup> and (D) CXCR3<sup>+</sup> and cytokine producing cells were gated on (E) IFN- $\gamma$ <sup>+</sup> and IL-10<sup>+</sup>.

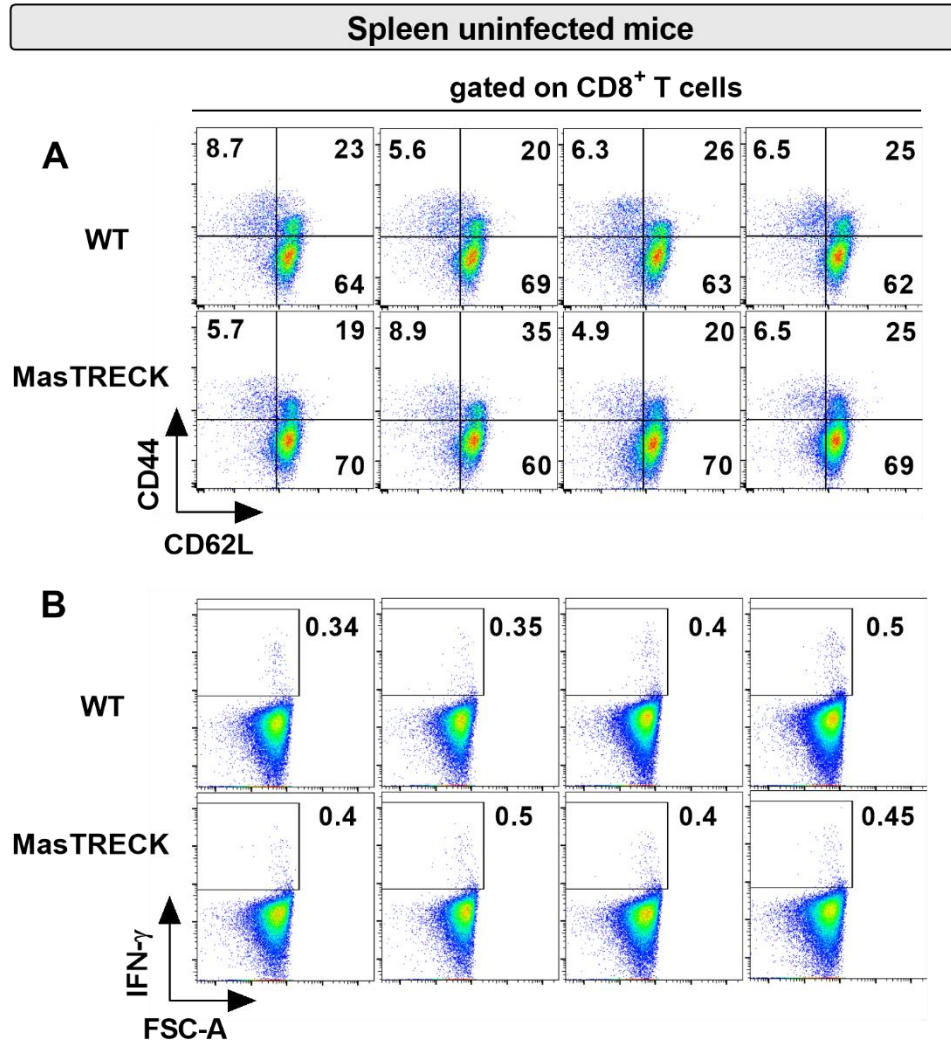

**Supplementary Figure 5. Uninfected WT and MC-deficient mice show comparable frequencies of naïve, activated and IFN- $\gamma$ -producing CD8<sup>+</sup> T cells.**

FACS plots show frequencies of (A) activated (CD44<sup>+</sup> CD62<sup>-</sup>) and naïve (CD44<sup>-</sup> CD62<sup>+</sup>) CD8<sup>+</sup> T cells and (B) IFN- $\gamma$ -producing CD8<sup>+</sup> T cells in the spleen after *ex vivo* restimulation with PMA/Ionomycin of uninfected WT and MasTRECK mice.

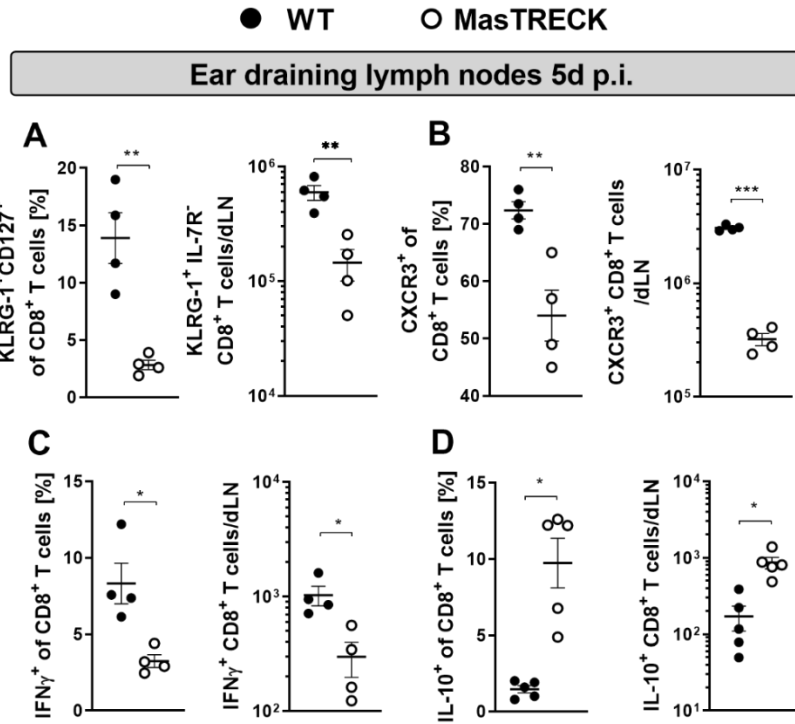

**Supplementary Figure 6. Mast cell deficient mice show impaired CD8<sup>+</sup> T cell phenotype and defective antiviral cytokine production in the ear-dLN** (A) Frequency and absolute number of KLRG1<sup>+</sup> IL-7R<sup>-</sup> cells and (B) CXCR3<sup>+</sup> gated on CD8<sup>+</sup> T cells in the ear-dLNs of WT and MasTRECK mice at day 5 post infection. (C) Frequencies and absolute numbers of IFN- $\gamma$ - and (D) IL-10-producing CD8<sup>+</sup> T cells in the ear-dLNs of WT and MasTRECK mice after ex vivo restimulation with GP33 and NP396 peptides. All experiments were performed at least twice, and each experimental group included  $n \geq 4$ . Data are representative and expressed as mean  $\pm$  SEM. Statistically significant differences are analyzed by t-test and indicated as follows: \* $p < 0.05$ , \*\* $p < 0.01$ , \*\*\* $p < 0.001$ .

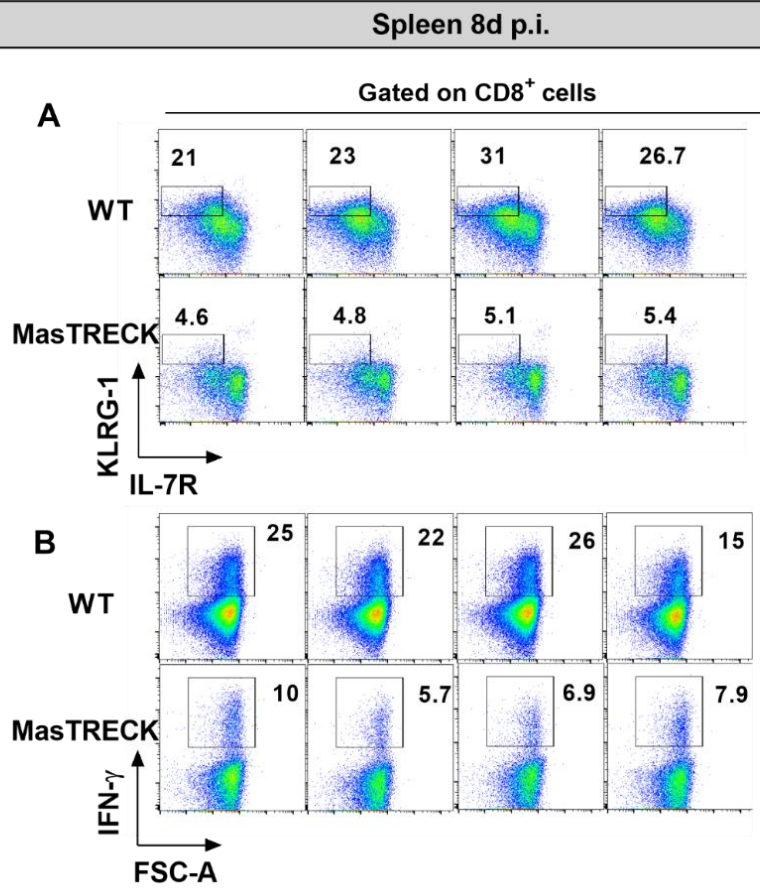

**Supplementary Figure 7. Mast cell deficient mice show impaired CD8<sup>+</sup> T cell effector phenotype and antiviral cytokine production after infection**

FACS plots show frequencies of (A) KLRG1<sup>+</sup> IL-7R<sup>-</sup> CD8<sup>+</sup> T cells and IFN- $\gamma$ -producing CD8<sup>+</sup> T cells in the spleen after *ex vivo* restimulation with GP33 and NP396 peptides of WT and MasTRECK mice at day 8 post LCMV infection.

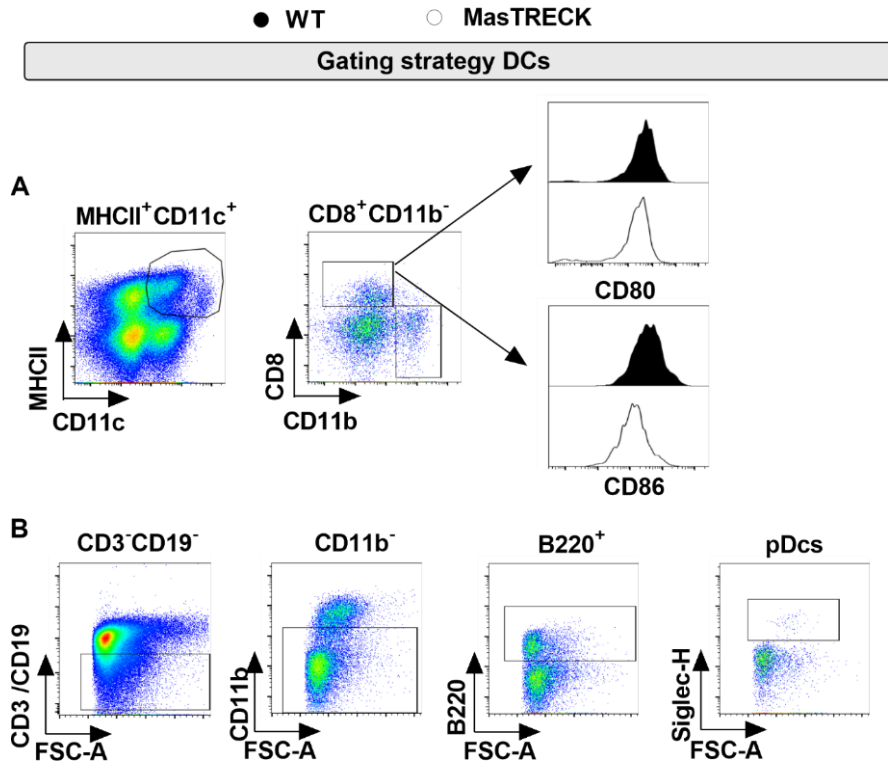

**Supplementary Figure 8. Gating strategy for DCs analysis**

Representative dot plots of the spleen showing the gating strategy used to analyze (A) DCs and (B) pDCs in the spleen, ear-dLNs and ears of WT and MasTRECK mice. After gating on DCs (MHCII<sup>+</sup>CD11c<sup>+</sup>), lymphocytic DCs were gated on CD8<sup>+</sup> CD11b<sup>-</sup> cells. Geometric mean fluorescent intensity of costimulatory molecules CD80 and CD86 was subsequently analyzed on CD8<sup>+</sup> CD11b<sup>-</sup> DCs as shown in the representative histograms. pDCs are Siglec-H<sup>+</sup> cells gated on CD11b<sup>-</sup> cells that were previously gated on CD3<sup>-</sup> CD19<sup>-</sup> CD11b<sup>-</sup> cells.

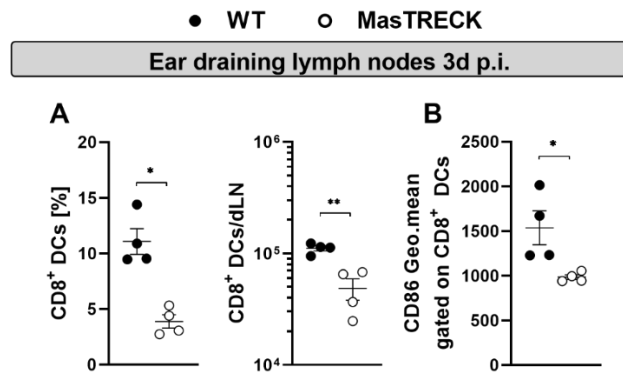

**Supplementary Figure 9. Dendritic cells activation is impaired in the ear-dLN after LCMV infection in mast cell deficient mice** (A) Frequency and absolute number of CD8<sup>+</sup> DCs in the dLNs of WT and MasTRECK mice on day 3 post LCMV infection. (B) Expression levels of CD86 (geometric mean of fluorescence intensity) gated on CD8<sup>+</sup> DCs in the spleen of WT and MasTRECK mice at day 3 post infection. All experiments were performed at least twice, and each experimental group included n ≥ 4. Data are representative and expressed as mean ± SEM. Statistically significant differences are analyzed by t-test and indicated as follows: \*p < 0.05, \*\*p < 0.01.

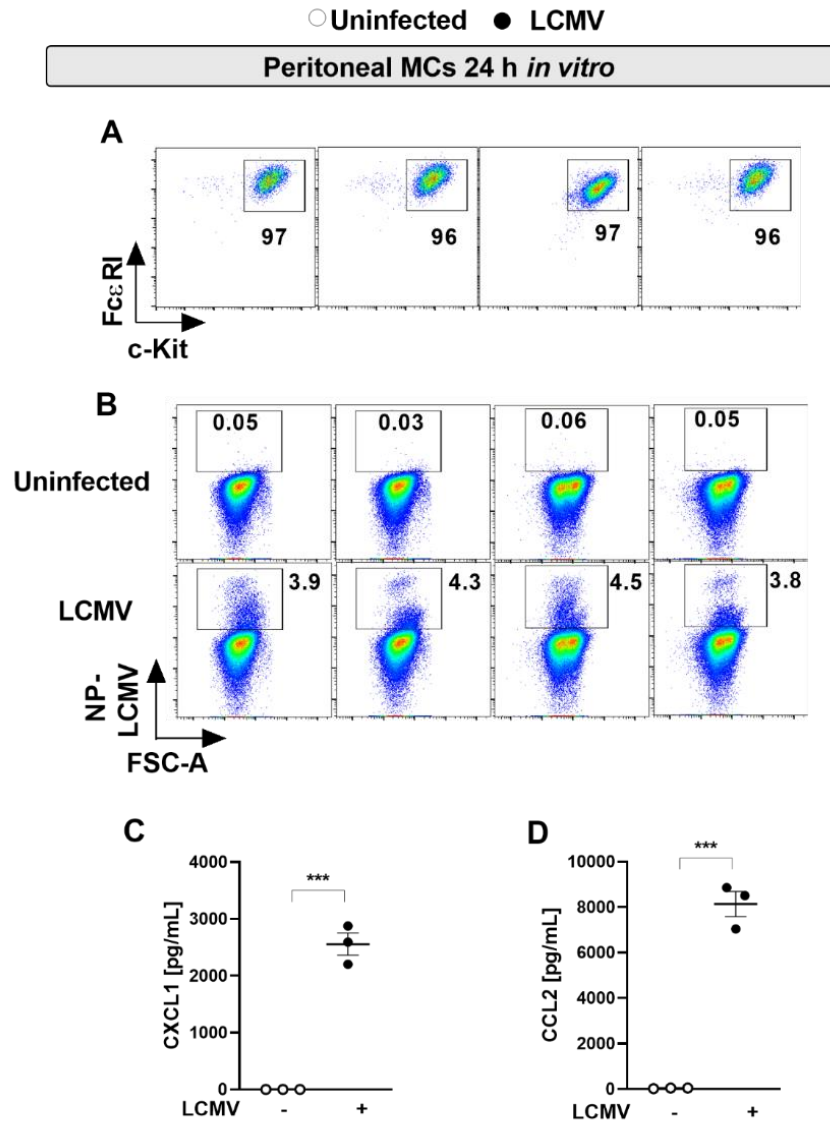

**Supplementary Figure 10. MCs produce CXCL1 and CCL2 after LCMV infection *in vitro***

(A) FACS plots show peritoneal MCs ( $Fc\epsilon RI^+ c\text{-Kit}^+$ ) after isolation by flow cytometry. (B) FACS plots show frequencies of peritoneal MCs infected with LCMV at MOI 5 for 24h *in vitro*. (C) CXCL1 and (D) CCL2 concentrations in the supernatant of peritoneal murine MCs after 24h of LCMV infection (MOI 5) assessed by the chemokine 26-Plex Mouse ProcartaPlex™ Panel 1.

All experiments were performed at least twice, and each experimental group included  $n \geq 3$ . Data are representative and expressed as mean  $\pm$  SEM. Statistically significant differences are analyzed by t-test and indicated as follows: \*\*\* $p < 0.001$ .
